# Supplementary material
Source: publisher site journal article supplement (https://www.dovepress.com/article/497563)
Supplement: Supplementary file 1 [file get_supplementary_file.php]

**Supplementary Tables and Figures**

to

“***Bimodal patterns of locomotor activity and sleep in Drosophila: a model for their simulation*”**

**Supplementary Tables S1, S2, S3, S4-1, S4-2, and S5.**

**Table S1.** Factors and categories of factors in three-way rANOVAs of locomotor activity and sleep.

| Reference | [1] | [1] | [3] | [4] | [4] | [4] |
| --- | --- | --- | --- | --- | --- | --- |
| Dataset (n) | 1 (82) | 2 (99) | 4 (428) | 9 (345) | 10 (414) | 11 (188) |
| Strain | Af10 | Af10 | Harwich | Wild | Wild | Wild |
|  | Af15 | Af15 | Canton-S | Long-lived | Long-lived | Long-lived |
|  | Am28 | Am28 | ♀C-S♂H | Starch | Starch | Starch |
|  | Fr30 | Fr30 |  | Salt | Salt | ♀L-l♂St |
|  |  |  |  |  |  | ♀St♂L-l |
| Temperature | 20°C | 20°C |  |  |  |  |
|  |  | 29°C | 29°C |  |  |  |
|  |  |  |  | 25°C | 25°C | 25°C |
| LD | DD |  | DD | DD | DD | DD |
| cycle |  | 4D20L |  |  |  |  |
| Season | Summer | Summer | Winter | Winter | Winter | Winter |
|  | Winter |  |  |  |  |  |
| Sex | Male | Male | Male | Male | Male | Male |
|  |  |  |  |  | Female | Female |
| Age | <1 week | <1 week |  | <1 week | <1 week | <1 week |
|  |  |  | <2 weeks |  |  |  |
|  |  |  | 2 weeks |  |  |  |
|  |  |  | 3 weeks |  |  |  |
|  |  |  | >3 weeks |  |  |  |
| Diet | Standard | Standard | Standard | Standard | Standard | Standard |
|  |  |  |  | Carbohydrate |  |  |
|  |  |  |  | Starch |  |  |
|  |  |  |  | Salt |  |  |

Notes: [1], [3] and [4]: See the reference list to this Supplementary Material. In rANOVAs, the only repeated measure (the 1st factor) was either “Time” (48 30-min intervals on the 24-h period) or “PC (Principal Component)score” (i.e., score on the 1st, 2nd, and 3rd PC). The second (independent) factor was “Strain” (or “Strain and Hybrid” or “Hybrid”) and the third and fourth (independent) factors included “Season”, “Temperature”, “Age”, “Sex”, “Diet”; n: Number of analyzed individual curves. ♀C-S♂H: A fly, born to a Harwich father and a Canton-S mother; ♀L-l♂St: A fly, born to a Starch father and a Long-lived mother; ♀St♂L-l: A fly, born to a Long-lived father and a Starch mother. Results of rANOVAs are reported in Tables S3 and S4 and illustrated in Figures S2(1-12) and S3(1-12).

**Table S2.** Factors and categories of factors in four-way rANOVAs of locomotor activity and sleep.

| Reference | [2] | [3] | [3] | [3] | [3] | [4] |
| --- | --- | --- | --- | --- | --- | --- |
| Dataset (n) | 3 (508) | 5 (181) | 6 (301) | 7 (742) | 8 (448) | 12 (527) |
| Strain | ♀C-S♂H | Harwich | Harwich | Harwich | Harwich | Wild |
|  | ♀H♂C-S | Canton-S | Canton-S | Canton-S | Canton-S | Long-lived |
|  |  |  |  |  |  | Starch |
| Temperature | 20°C | 20°C |  |  |  |  |
|  | 29°C | 29°C | 29°C | 29°C | 29°C |  |
|  |  |  |  |  |  | 25°C |
| LD | DD | DD | DD | DD | DD | DD |
| cycle |  |  | 12D12L |  |  |  |
| Sex | Male | Male | Male | Male | Male | Male |
|  | Female |  |  |  |  | Female |
| Age |  |  | <1 week |  | <1 week | <1 week |
|  | 1 week | 1 week |  | ≤1 week |  |  |
|  |  |  |  | ≥2 weeks |  |  |
|  |  |  |  |  |  | >3 weeks |
| Diet | Standard | Standard | Standard | Standard | Standard | Standard |
|  |  |  |  |  | Carbohydrate |  |
| Dose | x0 | x0 | x0 | x0 | x0 | x0 |
|  |  |  |  | x2.5 | x2.5 |  |
|  |  | x10 | x10 | x10 | x10 |  |

Notes: [2] - [4]: See the reference list to this Supplementary Material. In rANOVAs, the only repeated measure (the 1st factor) was either “Time” (48 30-min intervals on the 24-h period) or “PC (Principal Component)score” (i.e., score on the 1st, 2nd, and 3rd PC). The second (independent) factor was “Strain” (or “Strain and Hybrid” or “Hybrid”) and the third and fourth (independent) factors included “Temperature”, “Age”, “Sex”, “Diet”, “Cycle, “Dose”. ♀C-S♂H: A fly, born to a Harwich father and a Canton-S mother; ♀H♂C-S: A fly, born to a Canton-S father and a Harwich mother. Results of rANOVAs are reported in Tables S3 and S4 (two parts) and illustrated in Figures S2(1-12) and S3(1-12).

**Table S3.** Three-way rANOVAs of locomotor activity and sleep.

| #1 | Repeated measure | Time points (48) on 24-h interval | | | Scores (3) on PC | | |
| --- | --- | --- | --- | --- | --- | --- | --- |
|  |  | F-ratio | | df | F-ratio | | df |
| # | Behavioral measure | Activity | Sleep |  | Activity | Sleep |  |
|  | Dataset 1 | Four strains (#2) + two seasons (#3) | | | | | |
| 1st | “Time” or “PC score” | 36.4*** | 65.4*** | 47/3478 | 5.7** | 45.9*** | 2/148 |
| 2nd | “Strain” | 26.6*** | 48.8*** | 3/74 | 36.8*** | 78.7*** | 3/74 |
| 3rd | “Season” | 0.4 | 0.9 | 1/74 | 4.9* | 18.8*** | 1/74 |
|  | 2*3 | 5.3** | 2.1 | 3/74 | 2.8* | 4.2** | 3/74 |
|  | 1*2 | 9.7*** | 7.9*** | 141/3478 | 10.2*** | 11.9*** | 6/148 |
|  | 1*3 | 18.0*** | 22.9*** | 47/3478 | 70.2*** | 75.6*** | 2/148 |
|  | 1*2*3 | 6.1*** | 6.8*** | 141/3478 | 8.5*** | 7.4*** | 6/148 |
|  | Dataset 2 | Four strains (#2) + two temperatures (#3) | | | | | |
| 1st | “Time” or “PC score” | 32.9*** | 43.3*** | 47/4277 | 91.5*** | 78.5*** | 2/182 |
| 2nd | “Strain” | 16.4*** | 18.0*** | 3/91 | 21.9*** | 25.0*** | 3/91 |
| 3rd | “Temperature” | 0.7 | 1.5 | 1/91 | 3.1 | 0.1 | 1/91 |
|  | 2*3 | 6.2** | 4.9** | 3/91 | 2.4* | 0.9 | 3/91 |
|  | 1*2 | 8.4*** | 6.7*** | 141/4277 | 2.1 | 4.0** | 6/182 |
|  | 1*3 | 11.9*** | 17.8*** | 47/4277 | 18.6*** | 31.4*** | 2/182 |
|  | 1*2*3 | 3.2*** | 4.6*** | 141/4277 | 5.4*** | 8.5*** | 6/182 |
|  | Dataset 4 | Two strains and hybrid (#2) + four ages (#3) | | | | | |
| 1st | “Time” or “PC score” | 25.2*** | 48.5*** | 47/19552 | 71.9*** | 65.7*** | 2/832 |
| 2nd | “Strain or hybrid” | 50.4*** | 50.2*** | 2/416 | 37.3*** | 52.1*** | 2/416 |
| 3rd | “Age” | 5.3** | 7.5*** | 3/416 | 5.3** | 10.8*** | 3/416 |
|  | 2*3 | 2.5* | 2.0 | 6/416 | 2.0 | 2.5* | 6/416 |
|  | 1*2 | 7.1*** | 12.0*** | 94/19552 | 6.0*** | 4.4** | 4/832 |
|  | 1*3 | 3.7*** | 4.3*** | 141/19552 | 3.7** | 4.5*** | 6/832 |
|  | 1*2*3 | 1.5** | 1.5** | 282/19552 | 2.6** | 2.9** | 12/832 |
|  | Dataset 9 | Four strains (#2) + four diets (#3) | | | | | |
| 1st | “Time” or “PC score” | 56.0*** | 137.0*** | 47/15463 | 15.0*** | 14.8*** | 2/658 |
| 2nd | “Strain” | 15.1*** | 17.6*** | 3/329 | 14.1*** | 27.2*** | 3/329 |
| 3rd | “Diet” | 4.7** | 6.2*** | 3/329 | 8.5*** | 26.9*** | 3/329 |
|  | 2*3 | 4.8*** | 7.9*** | 9/329 | 0.8 | 2.1* | 9/329 |
|  | 1*2 | 13.1*** | 16.5*** | 141/15463 | 23.3*** | 26.8*** | 6/658 |
|  | 1*3 | 17.7*** | 22.6*** | 141/15463 | 28.2*** | 26.7*** | 6/658 |
|  | 1*2*3 | 4.5*** | 4.3*** | 423/15463 | 8.3*** | 7.4*** | 18/658 |
|  | Dataset 10 | Four strains (#2) + two sexes (#3) | | | | | |
| 1st | “Time” or “PC score” | 114.1*** | 219.4*** | 47/19082 | 90.6*** | 96.3*** | 2/812 |
| 2nd | “Strain” | 20.7*** | 19.5*** | 3/406 | 7.0*** | 17.7*** | 3/406 |
| 3rd | “Sex” | 3.9* | 3.7 | 1/406 | 0.1 | 0.8 | 1/406 |
|  | 2*3 | 1.5 | 2.0 | 3/406 | 1.6 | 1.1 | 3/406 |
|  | 1*2 | 18.6*** | 17.8*** | 141/19082 | 36.2*** | 29.5*** | 6/812 |
|  | 1*3 | 4.8*** | 4.7*** | 47/19082 | 6.1** | 4.4* | 2/812 |
|  | 1*2*3 | 2.1** | 2.2*** | 141/19082 | 1.2 | 2.4* | 6/812 |
|  | Dataset 11 | Four strains and two hybrids (#2) + two sexes (#3) | | | | | |
| 1st | “Time” or “PC score” | 117.6*** | 232.9*** | 47/8366 | 110.4*** | 211.8*** | 2/356 |
| 2nd | “Strain or hybrid” | 23.7*** | 6.8*** | 4/178 | 8.6*** | 12.2*** | 4/178 |
| 3rd | “Sex” | 0.0 | 5.1*** | 1/178 | 0.0 | 1.0 | 1/178 |
|  | 2*3 | 2.6* | 2.1*** | 4/178 | 2.1 | 1.5 | 4/178 |
|  | 1*2 | 10.1*** | 10.9*** | 188/8366 | 19.9*** | 12.0*** | 8/356 |
|  | 1*3 | 3.5** | 4.9*** | 47/8366 | 1.0 | 0.8 | 2/356 |
|  | 1*2*3 | 1.7* | 3.5*** | 188/8366 | 1.5 | 4.6*** | 8/356 |

Notes: Six rANOVAs with the repeated measure “Time” (48 30-min intervals on the 24-h period) or the 1st, 2nd, and 3rd PC (Principal Component)score. The independent factors are “Strain” and either “Season” or “Temperature” or “Age” or “Diet” or “Sex”; df: Degrees of freedom were corrected using Greenhouse–Geisser correction controlling for type 1 errors associated with the violation of the sphericity assumption, but the original degrees of freedom are reported in this table. Level of significance for F-ratio: * *p* < 0.05, ** *p* < 0.01, *** *p* < 0.001; #: Factor’s order. Results are illustrated in Figures S2(1,2,4,9-11) and S3(1,2,4,9-11).

**Table S4-1.** Four-way rANOVAs of locomotor activity and sleep (part 1).

| #1 | Repeated measure | Time points (48) on 24-h interval | | | Scores (3) on PC | | |
| --- | --- | --- | --- | --- | --- | --- | --- |
|  |  | F-ratio | | df | F-ratio | | df |
| # | Behavioral measure | Activity | Sleep |  | Activity | Sleep |  |
|  | Dataset 3 | Two hybrids (#2) + two temperatures (#3) + two sexes (#4) | | | | | |
| 1st | “Time” or “PC score” | 245.6*** | 394.8*** | 47/23500 | 39.6*** | 112.2*** | 2/1000 |
| 2nd | “Hybrid” | 26.3*** | 41.5*** | 1/500 | 1.0 | 8.3** | 1/500 |
| 3rd | “Temperature” | 27.3*** | 14.0*** | 1/500 | 197.7*** | 168.1*** | 1/500 |
| 4th | “Sex” | 8.2** | 1.5 | 1/500 | 1.0 | 16.3*** | 1/500 |
|  | 2*3 | 2.4 | 1.3 | 1/500 | 0.9 | 0.1 | 1/500 |
|  | 2*4 | 0.2 | 0.2 | 1/500 | 17.6*** | 12.8*** | 1/500 |
|  | 3*4 | 3.5 | 0.6 | 1/500 | 55.5*** | 41.1*** | 1/500 |
|  | 2*3*4 | 0.7 | 0.0 | 1/500 | 3.2 | 0.5 | 1/500 |
|  | 1*2 | 2.6** | 4.1*** | 47/23500 | 14.4*** | 22.2*** | 2/1000 |
|  | 1*3 | 37.5*** | 34.6*** | 47/23500 | 9.7*** | 11.6*** | 2/1000 |
|  | 1*4 | 17.5*** | 37.7*** | 47/23500 | 48.2*** | 72.4*** | 2/1000 |
|  | 1*2*3 | 2.5** | 2.8** | 47/23500 | 3.2* | 3.4* | 2/1000 |
|  | 1*2*4 | 7.7*** | 8.9*** | 47/23500 | 13.6*** | 19.0*** | 2/1000 |
|  | 1*3*4 | 12.9*** | 13.4*** | 47/23500 | 6.1** | 7.2** | 2/1000 |
|  | 1*2*3*4 | 2.6** | 2.1* | 47/23500 | 0.3 | 1.0 | 2/1000 |
|  | Dataset 5 | Two strains (#2) + two temperatures (#3) + two doses (#4) | | | | | |
| 1st | “Time” or “PC score” | 22.1*** | 39.0*** | 47/8131 | 43.5*** | 60.6*** | 2/346 |
| 2nd | “Strain” | 65.7*** | 134.8*** | 1/173 | 36.6*** | 81.2*** | 1/173 |
| 3rd | “Temperature” | 22.6*** | 16.5*** | 1/173 | 33.7*** | 26.3*** | 1/173 |
| 4th | “Dose” | 5.7* | 4.4* | 1/173 | 5.5* | 4.1* | 1/173 |
|  | 2*3 | 17.2*** | 18.4*** | 1/173 | 0.5 | 0.2 | 1/173 |
|  | 2*4 | 1.1 | 0.5 | 1/173 | 1.9 | 0.1 | 1/173 |
|  | 3*4 | 2.0 | 0.3 | 1/173 | 1.9 | 0.9 | 1/173 |
|  | 2*3*4 | 0.3 | 0.0 | 1/173 | 0.7 | 0.2 | 1/173 |
|  | 1*2 | 8.1*** | 5.6*** | 47/8131 | 21.4*** | 29.0*** | 2/346 |
|  | 1*3 | 15.5*** | 17.7*** | 47/8131 | 26.0*** | 58.1*** | 2/346 |
|  | 1*4 | 3.3** | 5.1*** | 47/8131 | 5.3* | 15.6*** | 2/346 |
|  | 1*2*3 | 8.5*** | 9.8*** | 47/8131 | 36.7*** | 54.0*** | 2/346 |
|  | 1*2*4 | 0.7 | 0.9 | 47/8131 | 0.2 | 2.6 | 2/346 |
|  | 1*3*4 | 1.1 | 1.6 | 47/8131 | 0.4 | 5.6* | 2/346 |
|  | 1*2*3*4 | 0.8 | 0.6 | 47/8131 | 0.5 | 0.4 | 2/346 |
|  | Dataset 6 | Two strains (#2) + two cycles (#3) + two doses (#4) | | | | | |
| 1st | “Time” or “PC score” | 117.7*** | 190.5*** | 47/13771 | 113.0*** | 217.5*** | 2/586 |
| 2nd | “Strain” | 133.9*** | 153.0*** | 1/293 | 207.7*** | 223.7*** | 1/293 |
| 3rd | “Cycle” | 0.6 | 6.5* | 1/293 | 13.1*** | 1.2 | 1/293 |
| 4th | “Dose” | 0.7 | 1.2 | 1/293 | 3.8* | 15.1*** | 1/293 |
|  | 2*3 | 0.1 | 0.9 | 1/293 | 11.2** | 2.4 | 1/293 |
|  | 2*4 | 0.7 | 5.4* | 1/293 | 0.0 | 1.1 | 1/293 |
|  | 3*4 | 1.2 | 0.6 | 1/293 | 1.6 | 1.2 | 1/293 |
|  | 2*3*4 | 1.1 | 0.4 | 1/293 | 0.6 | 1.1 | 1/293 |
|  | 1*2 | 46.0*** | 57.6*** | 47/13771 | 39.1*** | 74.8*** | 2/586 |
|  | 1*3 | 20.2*** | 18.3*** | 47/13771 | 8.4** | 7.6** | 2/586 |
|  | 1*4 | 21.7*** | 30.0*** | 47/13771 | 33.4*** | 76.3*** | 2/586 |
|  | 1*2*3 | 6.6*** | 6.4*** | 47/13771 | 4.7* | 4.5* | 2/586 |
|  | 1*2*4 | 4.9*** | 3.6*** | 47/13771 | 7.3** | 10.1*** | 2/586 |
|  | 1*3*4 | 1.9*** | 3.0*** | 47/13771 | 2.4 | 1.7 | 2/586 |
|  | 1*2*3*4 | 1.0 | 1.7 | 47/13771 | 0.5 | 0.1 | 2/586 |

Notes: Three of six rANOVAs with the repeated measure “Time” (48 30-min intervals on the 24-h period) or PC score (the 1st, 2nd, and 3rd). Two independent factors except “Strain” include “Temperature”, “Sex”, “Age”, “Cycle”, “Dose”; Level of significance: * p < 0.05, ** p < 0.01, *** p < 0.001; Results are illustrated in Figures S2(3,5,6) and S3(3,5,6).

**Table S4-2.** Four-way rANOVAs of locomotor activity and sleep (part 2).

| #1 | Repeated measure | Time points (48) on 24-h interval | | | Scores (3) on PC | | |
| --- | --- | --- | --- | --- | --- | --- | --- |
|  |  | F-ratio | | df | F-ratio | | df |
| # | Behavioral measure | Activity | Sleep |  | Activity | Sleep |  |
|  | Dataset 7 | Two strains (#2) + two ages (#3) + two doses (#4) | | | | | |
| 1st | “Time” or “PC score” | 44.5*** | 91.8*** | 47/34310 | 159.9*** | 176.6*** | 2/1460 |
| 2nd | “Strain” | 142.9*** | 188.7*** | 1/730 | 100.0*** | 224.8*** | 1/730 |
| 3rd | “Age” | 26.7*** | 45.0*** | 1/730 | 46.4*** | 102.7*** | 1/730 |
| 4th | “Dose” | 0.7 | 0.4 | 2/730 | 1.9 | 1.0 | 2/730 |
|  | 2*3 | 0.0 | 2.3 | 1/730 | 1.2 | 2.7 | 1/730 |
|  | 2*4 | 3.9* | 9.6*** | 2/730 | 7.2** | 8.2*** | 2/730 |
|  | 3*4 | 1.7 | 3.8* | 2/730 | 0.6 | 2.0 | 2/730 |
|  | 2*3*4 | 0.5 | 0.3 | 2/730 | 0.6 | 0.6 | 2/730 |
|  | 1*2 | 17.6*** | 26.5*** | 47/34310 | 27.7*** | 18.8*** | 2/1460 |
|  | 1*3 | 19.1*** | 26.3*** | 47/34310 | 0.0 | 3.6* | 2/1460 |
|  | 1*4 | 4.4*** | 6.8*** | 94/34310 | 7.0*** | 14.3*** | 4/1460 |
|  | 1*2*3 | 2.9*** | 5.6*** | 47/34310 | 0.5 | 6.2** | 2/1460 |
|  | 1*2*4 | 3.6*** | 4.1*** | 94/34310 | 2.8* | 7.0*** | 4/1460 |
|  | 1*3*4 | 1.4 | 1.9** | 94/34310 | 2.8* | 3.7** | 4/1460 |
|  | 1*2*3*4 | 1.0 | 1.6 | 94/34310 | 1.2 | 1.8 | 4/1460 |
|  | Dataset 8 | Two strains (#2) + two diets (#3) + two doses (#4) | | | | | |
| 1st | “Time” or “PC score” | 55.7*** | 101.1*** | 47/20445 | 102.5*** | 195.6*** | 2/872 |
| 2nd | “Strain” | 102.6*** | 220.0*** | 1/436 | 97.5*** | 231.7*** | 1/436 |
| 3rd | “Diet” | 39.1*** | 91.9*** | 1/436 | 35.4*** | 82.4*** | 1/436 |
| 4th | “Dose” | 1.5 | 2.7 | 2/436 | 0.3 | 0.6 | 2/436 |
|  | 2*3 | 16.8*** | 22.4*** | 1/436 | 12.2*** | 9.6** | 1/436 |
|  | 2*4 | 1.2 | 0.7 | 2/436 | 2.1 | 4.2* | 2/436 |
|  | 3*4 | 3.7* | 7.4** | 2/436 | 0.1 | 7.4** | 2/436 |
|  | 2*3*4 | 1.3 | 0.7 | 2/436 | 2.8 | 0.7 | 2/436 |
|  | 1*2 | 18.7*** | 21.2*** | 47/20445 | 24.0*** | 27.7*** | 2/872 |
|  | 1*3 | 9.4*** | 14.0*** | 47/20445 | 7.3** | 17.9*** | 2/872 |
|  | 1*4 | 6.2*** | 11.4*** | 94/20445 | 6.5*** | 14.1*** | 4/872 |
|  | 1*2*3 | 6.6*** | 6.4*** | 47/20445 | 12.4*** | 15.5*** | 2/872 |
|  | 1*2*4 | 5.0*** | 6.9*** | 94/20445 | 5.4*** | 9.7*** | 4/872 |
|  | 1*3*4 | 1.5* | 3.1*** | 94/20445 | 5.6** | 7.0*** | 4/872 |
|  | 1*2*3*4 | 2.7*** | 4.0*** | 94/20445 | 4.2** | 4.7** | 4/872 |
|  | Dataset 12 | Three strains (#2) + two ages (#3) + two sexes (#4) | | | | | |
| 1st | “Time” or “PC score” | 133.1*** | 263.7*** | 47/24205 | 64.9*** | 94.0*** | 2/1030 |
| 2nd | “Strain” | 87.6*** | 46.3*** | 2/515 | 31.9*** | 61.3*** | 2/515 |
| 3rd | “Age” | 0.0 | 4.4* | 1/515 | 11.4** | 0.5 | 1/515 |
| 4th | “Sex” | 19.4*** | 7.2** | 1/515 | 11.2** | 0.1 | 1/515 |
|  | 2*3 | 12.9*** | 15.3*** | 2/515 | 9.9* | 9.3* | 2/515 |
|  | 2*4 | 1.0 | 0.4 | 2/515 | 2.1 | 1.1 | 2/515 |
|  | 3*4 | 2.5 | 5.7* | 1/515 | 2.4 | 0.6 | 1/515 |
|  | 2*3*4 | 0.5 | 0.3 | 2/515 | 1.6 | 0.4 | 2/515 |
|  | 1*2 | 38.7*** | 27.6*** | 94/24205 | 77.1*** | 41.3*** | 4/1030 |
|  | 1*3 | 6.9*** | 11.9*** | 47/24205 | 2.9 | 10.4*** | 2/1030 |
|  | 1*4 | 15.2*** | 9.4*** | 47/24205 | 3.4* | 5.9** | 2/1030 |
|  | 1*2*3 | 12.8*** | 7.9*** | 94/24205 | 18.4*** | 10.9*** | 4/1030 |
|  | 1*2*4 | 4.0*** | 4.3*** | 94/24205 | 4.8** | 6.1*** | 4/1030 |
|  | 1*3*4 | 5.4*** | 5.1*** | 47/24205 | 3.4* | 5.0** | 2/1030 |
|  | 1*2*3*4 | 4.7*** | 2.3** | 94/24205 | 10.5*** | 4.2** | 4/1030 |

Notes: Three of six rANOVAs with the repeated measure “Time” (48 30-min intervals on the 24-h period) or PC score (the 1st, 2nd, and 3rd). Two independent factors except “Strain” or “Hybrid” include “Temperature”, “Age”, “Sex”, “Diet”, “Dose”. Level of significance for F-ratio: * *p* < 0.05, ** *p* < 0.01, *** *p* < 0.001; #: Factor’s order. Results are illustrated in Figures S2(7,8,12) and S3(7,8,12).

**Table S5.** Resume on the results of rANOVAs with two different repeated measures.

|  | Act. | Sleep | Act. | Sleep | Act. | Sleep | Act. | Sleep | Act. | Sleep | Act. | Sleep |
| --- | --- | --- | --- | --- | --- | --- | --- | --- | --- | --- | --- | --- |
| Dataset | 1 |  | 2 |  | 4 |  | 9 |  | 10 |  | 11 |  |
| 1st | ***/** | ***/*** | ***/*** | ***/*** | ***/*** | ***/*** | ***/*** | ***/*** | ***/*** | ***/*** | ***/*** | ***/*** |
| 2nd | ***/*** | ***/*** | ***/*** | ***/*** | ***/*** | ***/*** | ***/*** | ***/*** | ***/*** | ***/*** | ***/*** | ***/*** |
| 3rd | -/* | -/*** | -/- | -/- | **/** | ***/*** | **/*** | ***/*** | */- | -/- | -/- | ***/- |
| 1*2 | ***/*** | ***/*** | ***/- | ***/** | ***/*** | ***/** | ***/*** | ***/*** | ***/*** | ***/*** | ***/*** | ***/*** |
| 1*3 | ***/*** | ***/*** | ***/*** | ***/*** | ***/** | ***/*** | ***/*** | ***/*** | ***/** | ***/* | **/- | ***/- |
| 1*2*3 | ***/*** | ***/*** | ***/*** | ***/*** | **/** | **/** | ***/*** | ***/*** | **/- | ***/* | */- | ***/*** |
| Dataset | 3 |  | 5 |  | 6 |  | 7 |  | 8 |  | 12 |  |
| 1st | ***/*** | ***/*** | ***/*** | ***/*** | ***/*** | ***/*** | ***/*** | ***/*** | ***/*** | ***/*** | ***/*** | ***/*** |
| 2nd | ***/- | ***/** | ***/*** | ***/*** | ***/*** | ***/*** | ***/*** | ***/*** | ***/*** | ***/*** | ***/*** | ***/*** |
| 3rd | ***/*** | ***/*** | ***/*** | ***/*** | -/*** | */- | ***/*** | ***/*** | ***/*** | ***/*** | -/** | */- |
| 4th | **/- | -/*** | */* | */* | -/* | -/*** | -/- | -/- | -/- | -/- | ***/** | **/- |
| 1*2 | **/*** | ***/*** | ***/*** | ***/*** | ***/*** | ***/*** | ***/*** | ***/*** | ***/*** | ***/*** | ***/*** | ***/*** |
| 1*3 | ***/*** | ***/*** | ***/*** | ***/*** | ***/** | ***/** | ***/- | ***/* | ***/** | ***/*** | ***/- | ***/*** |
| 1*4 | ***/*** | ***/*** | **/* | ***/*** | ***/*** | ***/*** | ***/*** | ***/*** | ***/*** | ***/*** | ***/* | ***/** |
| 1*2*3 | **/* | **/* | ***/*** | ***/*** | ***/* | ***/* | ***/- | ***/** | ***/*** | ***/*** | ***/*** | ***/*** |
| 1*2*4 | ***/*** | ***/*** | -/- | -/- | ***/** | ***/*** | ***/* | ***/*** | ***/*** | ***/*** | ***/** | ***/*** |
| 1*3*4 | ***/** | ***/** | -/- | -/* | ***/- | ***/- | -/* | **/** | */** | ***/*** | ***/* | ***/** |
| 1*2*3*4 | **/- | */- | -/- | -/- | -/- | -/- | -/- | -/- | ***/** | ***/** | ***/*** | **/** |

Notes: Resume of the comparison of results reported in Tables S3 and S4 (two parts). In rANOVAs, the only repeated measure (the 1st factor) was either “Time” (48 30-min intervals on the 24-h period) or “PC (Principal Component)score” (i.e., score on the 1st, 2nd, and 3rd PC). The second (independent) factor was “Strain” (or “Strain and Hybrid” or “Hybrid”) and the third and fourth (independent) factors included “Season”, “Temperature”, “Age”, “Sex”, “Diet”, “Cycle, “Dose”. Act.: Locomotor activity; rANOVAs of a dataset with repeated measure “Time”/“PC score” yielded significance of F-ratio: - *p* > 0.05, * *p* < 0.05, ** *p* < 0.01, and *** *p* < 0.001. Results are illustrated in Figures S2(1-12) and S3(1-12).

**References**

[1] Zakharenko LP, Petrovskii DV, Putilov AA. Larks, owls, swifts, and woodcocks among fruit flies: differential responses of four heritable chronotypes to long and hot summer days. Nat Sci Sleep. 2018;10:181-191.

[2] Zakharenko LP, Petrovskii DV, Dorogova NV, Putilov AA. Association between the Effects of High Temperature on Fertility and Sleep in Female Intra-Specific Hybrids of Drosophila melanogaster. Insects. 2021;12(4):336.

[3] Zakharenko LP, Bobrovskikh MA, Gruntenko NE, Petrovskii DV, Verevkin EG, Putilov AA. Two Old Wild-Type Strains of Drosophila melanogaster Can Serve as an Animal Model of Faster and Slower Aging Processes. Insects. 2024; 15(5):329.

[4] Zakharenko LP, Petrovskii DV, Bobrovskikh MA, Gruntenko NE, Yakovleva EY, Markov AV, Putilov AA. Motus Vita Est: Fruit Flies Need to Be More Active and Sleep Less to Adapt to Either a Longer or Harder Life. Clocks Sleep. 2023;5(1):98-115.

**Supplementary Figures S1, S2(1-12), S3(1-12), S4, and S5**

**Legends to Figures S1, S2 1-12, S3 1-12, S4, and S5**

**Figure S1.** The 24-h curves of some of the parameters of the model.

The 24-h curves of some of the parameters of simulation of locomotor activity averaged over 4263 individual curves from Datasets 1-12 (see Table S1 and S2). (A)-(C) Names of the model’s parameters for simulation of locomotor activity, *X(t)*: upper asymptote, *Xu(t)*, lowest decay, *Xb(t)*, and highest buildup, *Xd(t)*, for *X(t)*, and the same two parameters for *Xu(t)* (upper asymptote), *Xbu(t)*, and *Xdu(t)*, respectively (see also Table 2 and Figure S1); 7:30-19:30 Photoperiod during equinoxes in Novosibirsk.

**Figure S2.** The 24-h curves of locomotor activity (A, B) and sleep (C, D) in Datasets 1-12.

1. Dataset 1. Effect of season on the curves in the following constant darkness condition (DD).

2. Dataset 2. Effect of high temperature in the condition of 20 h of light and 4 h of darkness.

3. Dataset 3. Effect of high temperature (29°C) on the curves in DD.

4. Dataset 4. Effect of the aging process on the curves in DD under 29°C.

5. Dataset 5. Effect of 29°C and caffeinated food on the curves in DD.

6. Dataset 6. Effect of 29°C and caffeinated food on the curves in DD and 12:12 light-dark cycle.

7. Dataset 7. Effect of the aging process, 29°C and caffeinated food on the curves in DD.

8. Dataset 8. Effect of 29°C and caffeinated food of different quality on the curves in DD.

9. Dataset 9. Effect of food of different quality on the curves in DD under 25°C.

10. Dataset 10. Effect of sex on the curves of four strains in DD under 25°C.

11. Dataset 11. Effect of sex on the curves of four strains and two crosses in DD under 25°C.

12. Dataset 12. Effect of sex and age on the curves of strains and crosses in DD under 25°C.

**Figure S3.** Principal component scores for locomotor activity (A) and sleep (B) in Datasets 1-12.

1. Dataset 1. Effect of season on the curves in the following constant darkness condition (DD).

2. Dataset 2. Effect of high temperature in the condition of 20 h of light and 4 h of darkness.

3. Dataset 3. Effect of high temperature (29°C) on the curves in DD.

4. Dataset 4. Effect of the aging process on the curves in DD under 29°C.

5. Dataset 5. Effect of 29°C and caffeinated food on the curves in DD.

6. Dataset 6. Effect of 29°C and caffeinated food on the curves in DD and 12:12 light-dark cycle.

7. Dataset 7. Effect of the aging process, 29°C and caffeinated food on the curves in DD.

8. Dataset 8. Effect of 29°C and caffeinated food of different quality on the curves in DD.

9. Dataset 9. Effect of food of different quality on the curves in DD under 25°C.

10. Dataset 10. Effect of sex on the curves of four strains in DD under 25°C.

11. Dataset 11. Effect of sex on the curves of four strains and two crosses in DD under 25°C.

12. Dataset 12. Effect of sex and age on the curves of strains and crosses in DD under 25°C.

**Figure S4.** Principal component scores for strains and their hybrids.

(A) Af10 and Af15: Two strains from P. Haddrill collected in Ghana. Am28: The strain #28265 maintained in the Bloomington Drosophila Stock Center and collected in Raleigh, North Carolina, USA. Fr30: The strain from P. Haddrill collected in Montpellier, France. (B) and (C) Canton-S: In 1935, Canton Special has been established by C. B. Bridges. Harwich: Wild flies were collected in in 1967 by M. L. Tracey, Jr. and M. G. Kidwell isolated and standardized its white-eyed mutant one decade later. (D) and (E) Wild: Flies were caught near Moscow and their descendants were reared in a laboratory without and with selection pressure. To maintain Salt and Starch strains, flies from the wild population were reared on these two adverse food substrates. Long-lived strain was maintained through artificial selection for late reproduction. All flies were studies in Novosibirsk. See the list of strains and their hybrids in Tables S1 and S2 and see significance of difference in their PC scores in Tables S3 and S4 containing the results of rANOVAs in which the second (independent) factor was “Strain” (or “Strain and Hybrid” or “Hybrid”).

**Figure S5.** Principal component scores for independent factors other than strain or hybrid.

See the list of factors and the categories of factors in Tables S1 and S2 and see significance of difference in their PC scores in Tables S3 and S4 containing the results of rANOVAs in which either the third or the third and fourth (independent) factors included “Sex” (A), “Age” (B), “Dose” (C), “Temperature” (D), “Diet” (E), “Light-dark cycle” (E), and “Season” (D).

**Figure S1.**

**Legends to Figure S2.** The 24-h curves of locomotor activity (A, B) and sleep (C, D) in Datasets 1-12.

The graphs illustrate the interactions of the within-group factor “Time” with two or three independent factors. See the description of the compared groups of flies in Tables S1 and S2 and see the results of testing significance of these interactions in Tables S3-S5.

1. Dataset 1. Effect of season on the curves in the following constant darkness condition (DD). The interactions of “Time” with two independent factors, “Season” (winter and summer) and “Strain” (four strains descendant from populations in Africa, USA and France), in DD.

2. Dataset 2. Effect of high temperature in the condition of 20 h of light and 4 h of darkness. The interactions of “Time” with two independent factors, “Temperature” (20°C and 29°C) and “Strain” (the same as in Dataset 1), in the condition of only 4 h of darkness.

3. Dataset 3. Effect of high temperature (29°C) on the curves in DD. The interactions of “Time” with three independent factors “Temperature” (20°C and 29°C), “Cross” (crosses of Harwich and Canton-S: ♀C-S♂H and ♀H♂C-S) and “Sex” (male and female), in DD.

4. Dataset 4. Effect of the aging process on the curves in DD under 29°C. The interactions of “Time” with two independent factors, “Age” (two weeks and younger) and “Strain/Cross” (Harwich and Canton-S and ♀C-S♂H), under high-temperature condition in DD.

5. Dataset 5. Effect of 29°C and caffeine-containing food on the curves in DD. The interactions of “Time” with three independent factors, “Temperature” (20°C and 29°C), “Strain” (Harwich and Canton-S) and “Food” (the maximal dose of caffeine and zero- control), in DD.

6. Dataset 6. Effect of 29°C and caffeinated food on the curves in DD and 12:12 light-dark cycle. The interactions of “Time” with three independent factors, “LD cycle” (standard LD and DD), “Strain” (Harwich and Canton-S) and “Food” (the maximal dose of caffeine and zero- control), in the high-temperature condition.

7. Dataset 7. Effect of the aging process, 29°C and caffeinated food on the curves in DD. The interactions of “Time” with three independent factors, “Age” (more than two weeks and less than one week), “Strain” (Harwich and Canton-S) and “Food” (two different doses of caffeine and zero- control), in the condition of DD and high-temperature.

8. Dataset 8. Effect of 29°C and caffeinated food of different quality on the curves in DD. The interactions of “Time” with three independent factors, “Strain” (Harwich and Canton-S) and “Food quality” (standard and carbohydrate-reach) and “Food caffeinated” (two different doses of caffeine and zero- control), in the condition of DD and high-temperature.

9. Dataset 9. Effect of food of different quality on the curves in DD under 25°C. The interactions of “Time” with three independent factors, “Strain” (unselected and selected for late reproduction and on starch- and salt-reach food) and “Food” (standard, carbohydrate-reach, starch- and salt-reach), in the condition of DD and under more comfortable temperature.

10. Dataset 10. Effect of sex on the curves of four strains in DD under 25°C. The interactions of “Time” with two independent factors, “Strain” (unselected and selected for late reproduction and on starch- and salt-reach food) and “Sex” (male and female), in the condition of DD and under more comfortable temperature.

11. Dataset 11. Effect of sex on the curves of four strains and two crosses in DD under 25°C. The interactions of “Time” with two independent factors, “Strain/Cross” (strains, unselected and selected for late reproduction and on starch-reach food, and the crosses of selected strains) and “Sex” (male and female), in the condition of DD and under more comfortable temperature.

12. Dataset 12. Effect of sex and age on the curves of strains and crosses in DD under 25°C. The interactions of “Time” with two independent factors, “Strain” (unselected and selected for late reproduction and on starch-reach food) and ““Age” (more than month and three days), in the condition of DD and under more comfortable temperature.

**Twelve Figures S2A-2D**

Figure S2(1)

Figure S2(2)

Figure S2(3)

Figure S2(4)

Figure S2(5)

Figure S2(6)

Figure S2(7)

Figure S2(8)

Figure S2(9)

Figure 2(10)

Figure S2(11)

Figure S2(12)

**Twelve Figures S3A-S3B**

Figure 3(1)

Figure S3(2)

Figure S3(3)

Figure S3(4)

Figure S3(5)

Figure S3(6)

Figure S3(7)

Figure S3(8)

Figure S3(9)

Figure S3(10)

Figure S3(11)

Figure S3(12)

**Figure S4**

**Figure S5**
